# Supplementary material for: Understanding the multiple interactions in vanadium-based SCR catalysts during simultaneous NOx and soot abatement
Source: Royal Society of Chemistry journal article supplement (doi:10.1039/d2cy00432a), 2022-01-01
Supplement: d2cy00432a1.pdf [file d2cy00432a1.pdf]

Supplementary Information for

**Understanding the multiple interactions in  
vanadium-based SCR catalysts during simultaneous  
NO<sub>x</sub> and soot abatement**

*Lei Zheng,<sup>1</sup> Maria Casapu,<sup>1</sup> Jan-Dierk Grunwaldt,<sup>1,2,\*</sup>*

<sup>1</sup> Institute for Chemical Technology and Polymer Chemistry (ITCP), Karlsruhe Institute of Technology (KIT), Engesserstraße 20, 76131 Karlsruhe, Germany

<sup>2</sup> Institute of Catalysis Research and Technology (IKFT), Karlsruhe Institute of Technology (KIT), Hermann-von-Helmholtz Platz 1, 76344, Eggenstein-Leopoldshafen, Germany

\*Corresponding author: Prof. Dr. Jan-Dierk Grunwaldt

Email: grunwaldt@kit.edu

## Content

|                                                                                       |           |
|---------------------------------------------------------------------------------------|-----------|
| <b>1. Experimental section</b> .....                                                  | <b>S3</b> |
| 1.1 Testing protocol .....                                                            | S3        |
| <b>2. Further / additional results</b> .....                                          | <b>S4</b> |
| 2.1 Catalyst characterization .....                                                   | S4        |
| 2.2 Summary of NTCO <sub>x</sub> results.....                                         | S5        |
| 2.3 Summary of T <sub>o</sub> results .....                                           | S6        |
| 2.4 Summary of T <sub>50p</sub> results .....                                         | S7        |
| 2.5 Influence of NO+H <sub>2</sub> O gas mixture on soot oxidation .....              | S8        |
| 2.6 Influence of NO <sub>2</sub> +H <sub>2</sub> O gas mixture on soot oxidation..... | S9        |
| 2.7 Effect of wet standard SCR gas mixture on soot oxidation .....                    | S10       |
| 2.8 Effect of wet fast SCR gas mixture on soot oxidation.....                         | S11       |
| 2.9 Effect of soot on SCR of NO <sub>x</sub> with NH <sub>3</sub> .....               | S12       |

# 1. Experimental section

## 1.1 Testing protocol

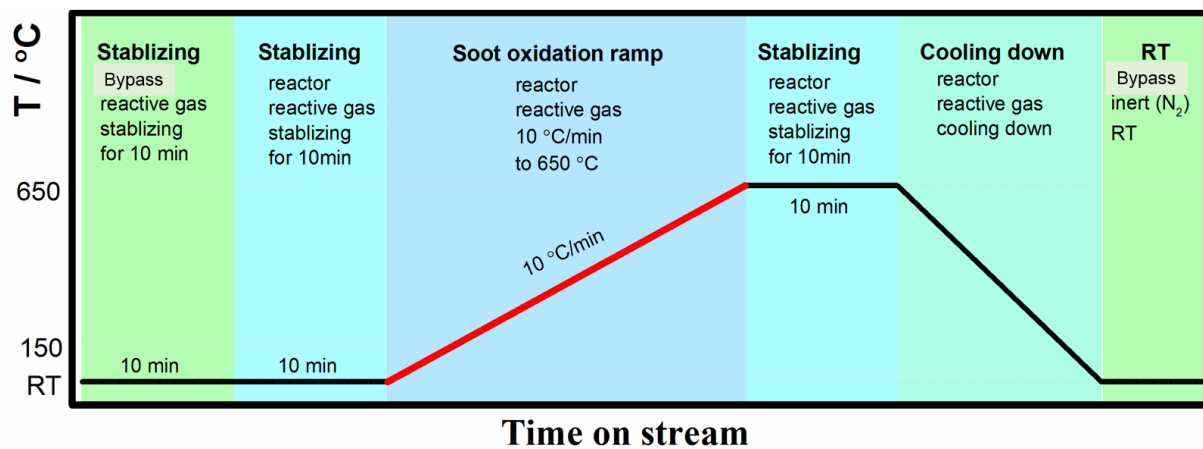

**Figure S1.** Testing protocol to probe gas-soot-catalyst interactions applied in the present study.

## 2. Further / additional results

### 2.1 Catalyst characterization

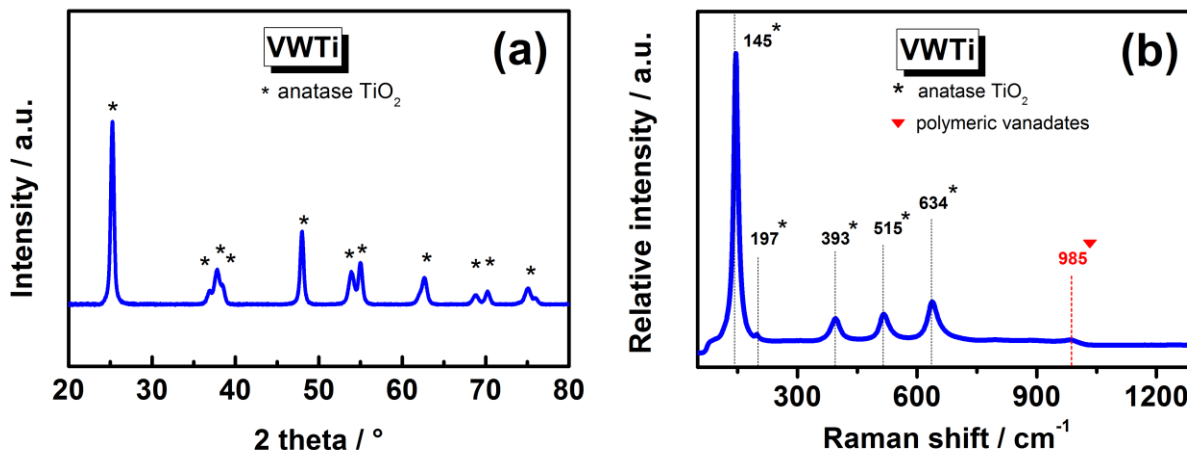

**Figure S2.** (a) X-ray diffraction (XRD) pattern of investigated VWTi catalyst: XRD pattern was recorded using a Bruker Advance D8 diffractometer with Ni-filtered Cu K $\alpha$  radiation (1.54060 Å) in a range of  $2\theta = 20\text{--}80^\circ$  and a step size of  $0.0150^\circ$ . (b) Raman spectra of investigated VWTi catalyst: Raman spectroscopy measurement was conducted on a Renishaw inVia confocal Raman microscope. A Nd-YAG laser with a wavelength of 532 nm (100 mW) and a 2400 l/mm grating was used. Spectra were taken with 0.5% laser power and ca. 40–50 spectra of a small line area were measured which were averaged after cosmic ray removal using Renishaw WiRE™ software.

**Table S1.** The specific surface area and chemical composition of the investigated VWTi catalyst.

| Sample | Specific surface area<br>$S_{\text{BET}}$ [m <sup>2</sup> /g] <sup>1</sup> | Elemental composition [wt.%] <sup>2</sup> |      |      |
|--------|----------------------------------------------------------------------------|-------------------------------------------|------|------|
|        |                                                                            | V                                         | W    | Ti   |
| VWTi   | 64                                                                         | 1.66                                      | 7.49 | 50.8 |

<sup>1</sup> The specific surface area was measured by N<sub>2</sub> physisorption at  $-196^\circ\text{C}$  using multipoint measurements on a BELSORP-mini instrument (MicrotracBEL, Osaka, Japan). Prior to the measurement, all samples were degassed in vacuum at  $300^\circ\text{C}$  for 2 h.

<sup>2</sup> Chemical composition of the catalyst is determined using inductively coupled plasma optical emission spectroscopy (ICP-OES) on an OPTIMA 4300 DV spectrometer (PerkinElmer). The standard deviation is below 0.4 for Ti, and below 0.1 for other elements. The V<sub>2</sub>O<sub>5</sub> and WO<sub>3</sub> concentrations are 2.96 wt.% and 10.01 wt.%, respectively, according to ICP-OES results, which is consistent with our target composition of 3 wt.% V<sub>2</sub>O<sub>5</sub>-10 wt.% WO<sub>3</sub>/TiO<sub>2</sub>.

## 2.2 Summary of NTCO<sub>x</sub> results

**Table S2.** List of the normalized total CO<sub>x</sub> formation (NTCO<sub>x</sub>) when feeding various SCR-related gas mixtures to different soot-catalyst contact types including soot-only, soot-catalyst in both loose and tight contact. NTCO<sub>x</sub> is a ratio that in each condition the obtained CO+CO<sub>2</sub> formation was normalized to the value obtained from O<sub>2</sub>-soot reaction (benchmark). The gas mixture mixtures are listed in Table 1.

| Gas mixture | Main factor                         | NTCO <sub>x</sub> (normalized by non-catalytic soot oxidation in 10%O <sub>2</sub> /N <sub>2</sub> ) |                           |                           |
|-------------|-------------------------------------|------------------------------------------------------------------------------------------------------|---------------------------|---------------------------|
|             |                                     | gas-soot                                                                                             | gas-soot-catalyst (loose) | gas-soot-catalyst (tight) |
| Gas-1       | inert (N <sub>2</sub> )             | 0.5                                                                                                  | 0.9                       | 1.7                       |
| Gas-2       | baseline (O <sub>2</sub> )          | 1.0                                                                                                  | 1.8                       | 12.9                      |
| Gas-3       | NO <sub>2</sub>                     | 12.7                                                                                                 | 11.6                      | 25.9                      |
| Gas-4       | NO                                  | 1.3                                                                                                  | 5.2                       | 20.4                      |
| Gas-5       | NH <sub>3</sub>                     | 0.4                                                                                                  | 3.2                       | 18.0                      |
| Gas-6       | H <sub>2</sub> O                    | 1.6                                                                                                  | 8.4                       | 26.7                      |
| Gas-7       | NO in H <sub>2</sub> O              | 1.7                                                                                                  | 11.8                      | 31.0                      |
| Gas-8       | NO <sub>2</sub> in H <sub>2</sub> O | 10.5                                                                                                 | 20.2                      | 33.6                      |
| Gas-9       | dry standard SCR                    | 0.6                                                                                                  | 4.9                       | 20.6                      |
| Gas-10      | dry fast SCR                        | 2.9                                                                                                  | 6.6                       | 22.9                      |
| Gas-11      | wet standard SCR                    | 1.2                                                                                                  | 12.6                      | 31.2                      |
| Gas-12      | wet fast SCR                        | 5.7                                                                                                  | 13.3                      | 34.0                      |

## 2.3 Summary of T<sub>o</sub> results

**Table S3.** List of the temperatures corresponding to the soot oxidation onset (T<sub>o</sub>), and the corresponding CO<sub>x</sub> formation at T<sub>o</sub> for all gas-soot-catalyst reactions. The gas mixture mixtures are listed in Table 1.

| Gas mixture | Main factor                         | T <sub>o</sub> (°C) and the corresponding CO+CO <sub>2</sub> emission (ppm) |                           |                                         |
|-------------|-------------------------------------|-----------------------------------------------------------------------------|---------------------------|-----------------------------------------|
|             |                                     | gas-soot                                                                    | gas-soot-catalyst (loose) | gas-soot-catalyst (tight)               |
| Gas-1       | inert (N <sub>2</sub> )             | - (-)                                                                       | 452 °C (22.7 ppm)         | 202 °C (6.4 ppm) and 312 °C (19 ppm)    |
| Gas-2       | baseline (O <sub>2</sub> )          | 346 °C (13 ppm)                                                             | 329 °C (28.5 ppm)         | 203 °C (13.6 ppm) and 329 °C (28 ppm)   |
| Gas-3       | NO <sub>2</sub>                     | 344 °C (12 ppm)                                                             | 315 °C (30.7 ppm)         | 204 °C (11.3 ppm) and 314 °C (32.5 ppm) |
| Gas-4       | NO                                  | 320 °C (18 ppm)                                                             | 312 °C (37 ppm)           | 212 °C (20 ppm) and 300 °C (40.5 ppm)   |
| Gas-5       | NH <sub>3</sub>                     | 348 °C (7.8 ppm)                                                            | 336 °C (16 ppm)           | 224 °C (9.5 ppm) and 337 °C (23.3 ppm)  |
| Gas-6       | H <sub>2</sub> O                    | 338 °C (13 ppm)                                                             | 310 °C (23.1 ppm)         | 203 °C (12.9 ppm) and 334 °C (32.5 ppm) |
| Gas-7       | NO in H <sub>2</sub> O              | 341 °C (11.2 ppm)                                                           | 331 °C (25.9 ppm)         | 217 °C (13 ppm) and 316 °C (27.1 ppm)   |
| Gas-8       | NO <sub>2</sub> in H <sub>2</sub> O | 313 °C (20.3 ppm)                                                           | 327 °C (40.2 ppm)         | - (-)                                   |
| Gas-9       | dry standard SCR                    | 347 °C (9.7 ppm)                                                            | 335 °C (18 ppm)           | 300 °C (20.5 ppm)                       |
| Gas-10      | dry fast SCR                        | 312 °C (13.7 ppm)                                                           | 333 °C (19.7 ppm)         | 300 °C (29.2 ppm)                       |
| Gas-11      | wet standard SCR                    | 345 °C (10.5 ppm)                                                           | 329 °C (23.9 ppm)         | 325 °C (24.3 ppm)                       |
| Gas-12      | wet fast SCR                        | 310 °C (17.8 ppm)                                                           | 332 °C (32 ppm)           | 203 °C (21.7 ppm) and 289 °C (28.7 ppm) |

## 2.4 Summary of $T_{50p}$ results

**Table S4.** List of the temperatures at CO+CO<sub>2</sub> formation of 50 ppm ( $T_{50p}$ , °C) for all investigated gas-soot-catalyst reactions. The gas mixture mixtures were listed in Table 1.

| Gas mixture | Main factor                         | $T_{50p}$ (°C) |                           |                           |
|-------------|-------------------------------------|----------------|---------------------------|---------------------------|
|             |                                     | gas-soot       | gas-soot-catalyst (loose) | gas-soot-catalyst (tight) |
| Gas-1       | inert (N <sub>2</sub> )             | -              | -                         | 617                       |
| Gas-2       | baseline (O <sub>2</sub> )          | 629            | 605                       | 515                       |
| Gas-3       | NO <sub>2</sub>                     | 468            | 460                       | 377                       |
| Gas-4       | NO                                  | 609            | 550                       | 474                       |
| Gas-5       | NH <sub>3</sub>                     | 649            | 573                       | 496                       |
| Gas-6       | H <sub>2</sub> O                    | 602            | 558                       | 470                       |
| Gas-7       | NO in H <sub>2</sub> O              | 595            | 508                       | 453                       |
| Gas-8       | NO <sub>2</sub> in H <sub>2</sub> O | 449            | 391                       | 349                       |
| Gas-9       | dry standard SCR                    | 648            | 559                       | 467                       |
| Gas-10      | dry fast SCR                        | 522            | 548                       | 468                       |
| Gas-11      | wet standard SCR                    | 604            | 532                       | 465                       |
| Gas-12      | wet fast SCR                        | 477            | 532                       | 459                       |

For Gas-10 and Gas-12, even lower  $T_{50p}$  was observed in gas-soot systems compared to gas-soot-catalyst (loose) systems, the integrated CO<sub>x</sub> formation was significantly lower, as shown in Figure 8 and Figure S5, respectively.

## 2.5 Influence of NO+H<sub>2</sub>O gas mixture on soot oxidation

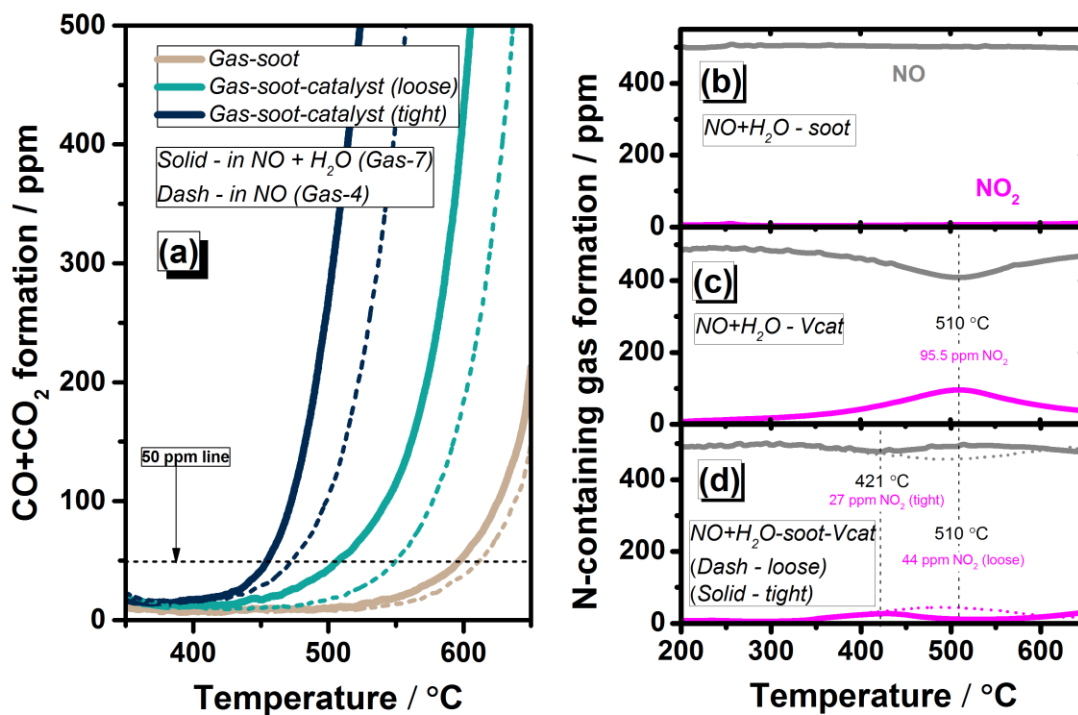

**Figure S3.** Comparison of gas evolution for NO+H<sub>2</sub>O-containing systems: (a) CO+CO<sub>2</sub> formation, the N-containing gases formation from (b) gas-soot system, (c) gas-catalyst system and (d) gas-soot-catalyst systems (loose and tight). Gas-7: 500 ppm NO, 5% H<sub>2</sub>O, 10% O<sub>2</sub> in N<sub>2</sub> with total gas flow of 300 mL/min. 5 mg soot with 245 mg catalyst (or inert quartz sand).



## 2.6 Influence of $\text{NO}_2+\text{H}_2\text{O}$ gas mixture on soot oxidation

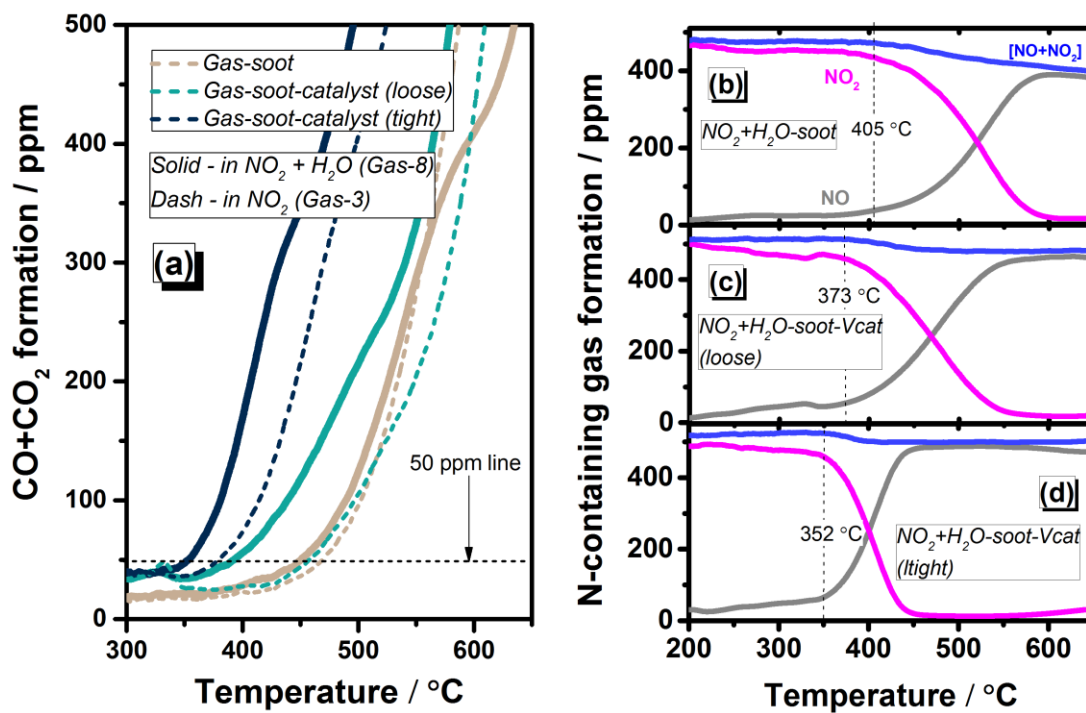

**Figure S4.** Comparison of gas evolution for  $\text{NO}_2+\text{H}_2\text{O}$ -containing systems: (a)  $\text{CO}+\text{CO}_2$  formation, the N-containing gases formation from (b) gas-soot system, (c) gas-catalyst system and (d) gas-soot-catalyst systems (loose and tight). Gas-8: 500 ppm  $\text{NO}_2$ , 5%  $\text{H}_2\text{O}$ , 10%  $\text{O}_2$  in  $\text{N}_2$  with total gas flow of 300 mL/min. 5 mg soot with 245 mg catalyst (or inert quartz sand).

## 2.7 Effect of wet standard SCR gas mixture on soot oxidation

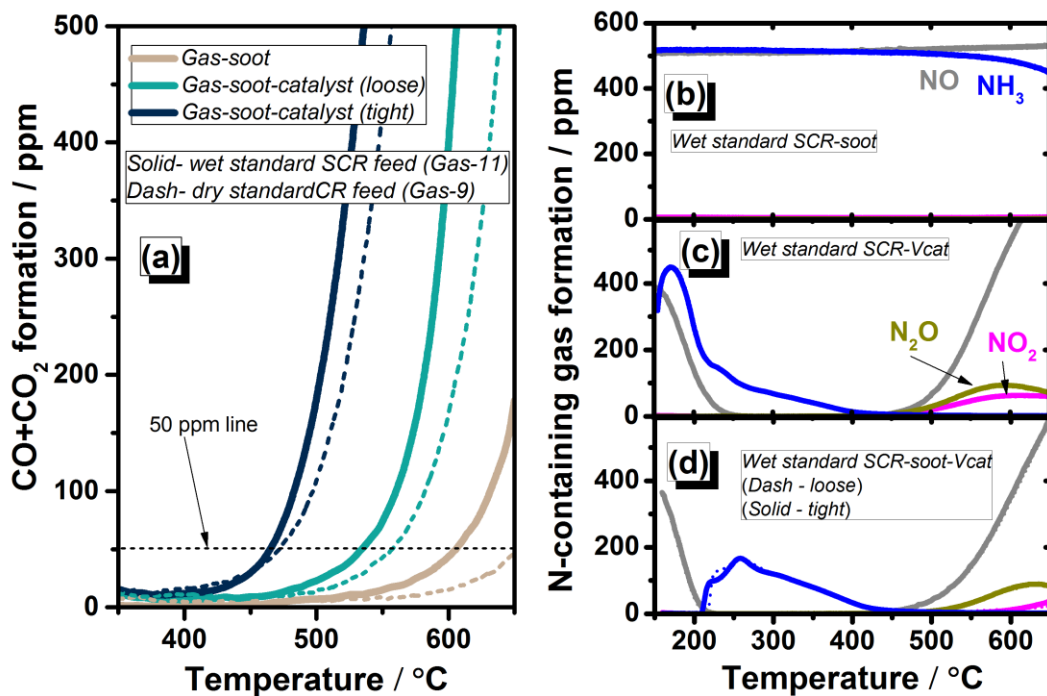

**Figure S5.** Comparison of gas evolution for wet standard SCR gas-containing systems: (a) CO+CO<sub>2</sub> formation, N-containing gases formation from (b) gas-soot system, (c) gas-catalyst system and (d) gas-soot-catalyst systems (loose and tight). Gas-11: 500 ppm NO, 500 ppm NH<sub>3</sub>, 5% H<sub>2</sub>O, 10% O<sub>2</sub> in N<sub>2</sub> with total gas flow of 300 mL/min. 5 mg soot with 245 mg catalyst (or inert quartz sand).

## 2.8 Effect of wet fast SCR gas mixture on soot oxidation

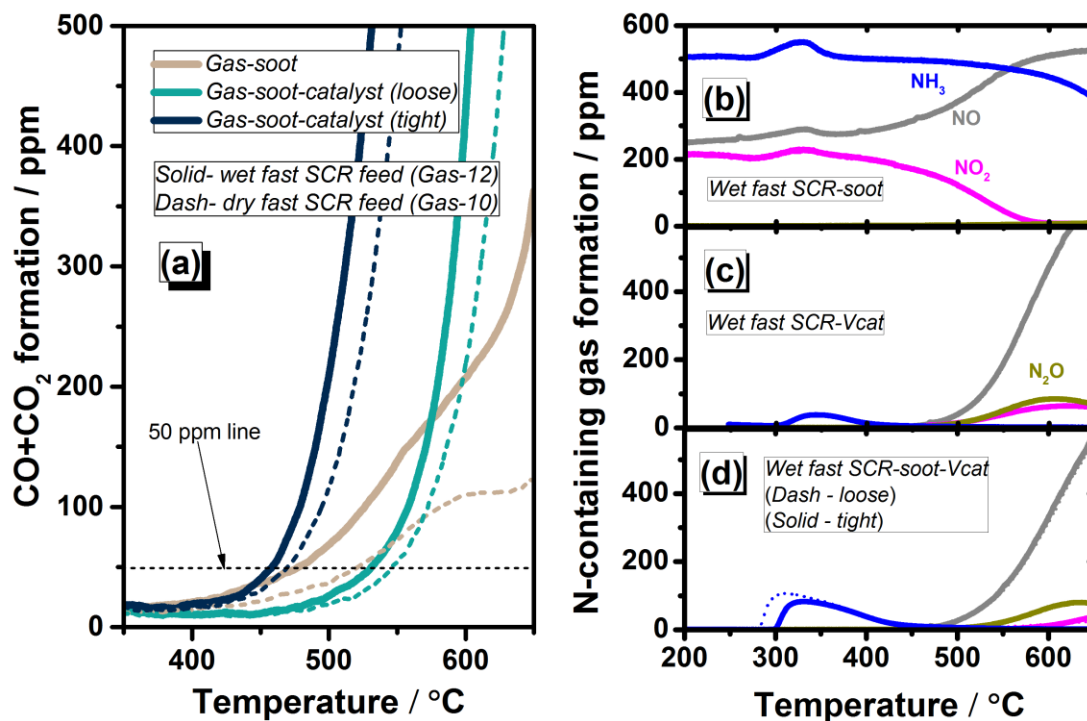

**Figure S6.** Comparison of gas evolution for wet fast SCR gas-containing systems: (a) CO+CO<sub>2</sub> formation, the N-containing gases formation from (b) gas-soot system, (c) gas-catalyst system and (d) gas-soot-catalyst systems (loose and tight). Gas-12: 250 ppm NO, 250 ppm NO<sub>2</sub>, 500 ppm NH<sub>3</sub>, 5% H<sub>2</sub>O, 10% O<sub>2</sub> in N<sub>2</sub> with total gas flow of 300 mL/min. 5 mg soot with 245 mg catalyst (or inert quartz sand).

## 2.9 Effect of soot on SCR of NO<sub>x</sub> with NH<sub>3</sub>

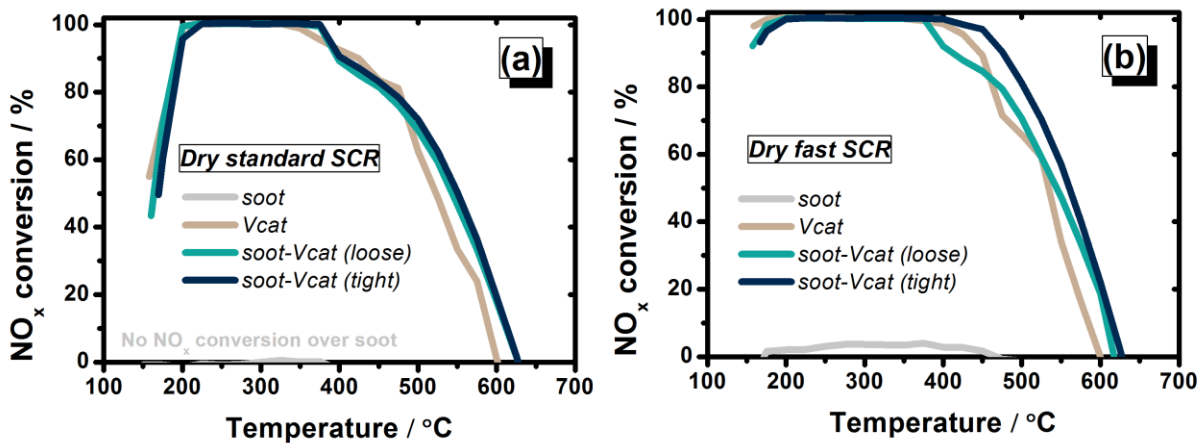

**Figure S7.** Comparison of NO<sub>x</sub> conversion from (a) dry standard SCR and (b) dry fast SCR over different gas-soot-catalyst reactions. Standard SCR: 500 ppm NO, 500 ppm NH<sub>3</sub>, 10% O<sub>2</sub> in N<sub>2</sub> with total gas flow of 300 mL/min; Fast SCR: 250 ppm NO, 250 ppm NO<sub>2</sub>, 500 ppm NH<sub>3</sub>, 10% O<sub>2</sub> in N<sub>2</sub> with total gas flow of 300 mL/min. 5 mg soot with 245 mg catalyst (or inert quartz sand).
